# Supplementary material for: CDK1-CCNB1 creates a spindle checkpoint–permissive state by enabling MPS1 kinetochore localization
Source: PubMed Central journal article supplement (PMC6446832; doi:10.1083/jcb.201808014), 2019-01-23
Supplement: JCB_201808014_sm.pdf [file JCB_201808014_sm.pdf]

## Supplemental material

Hayward et al., <https://doi.org/10.1083/jcb.201808014>

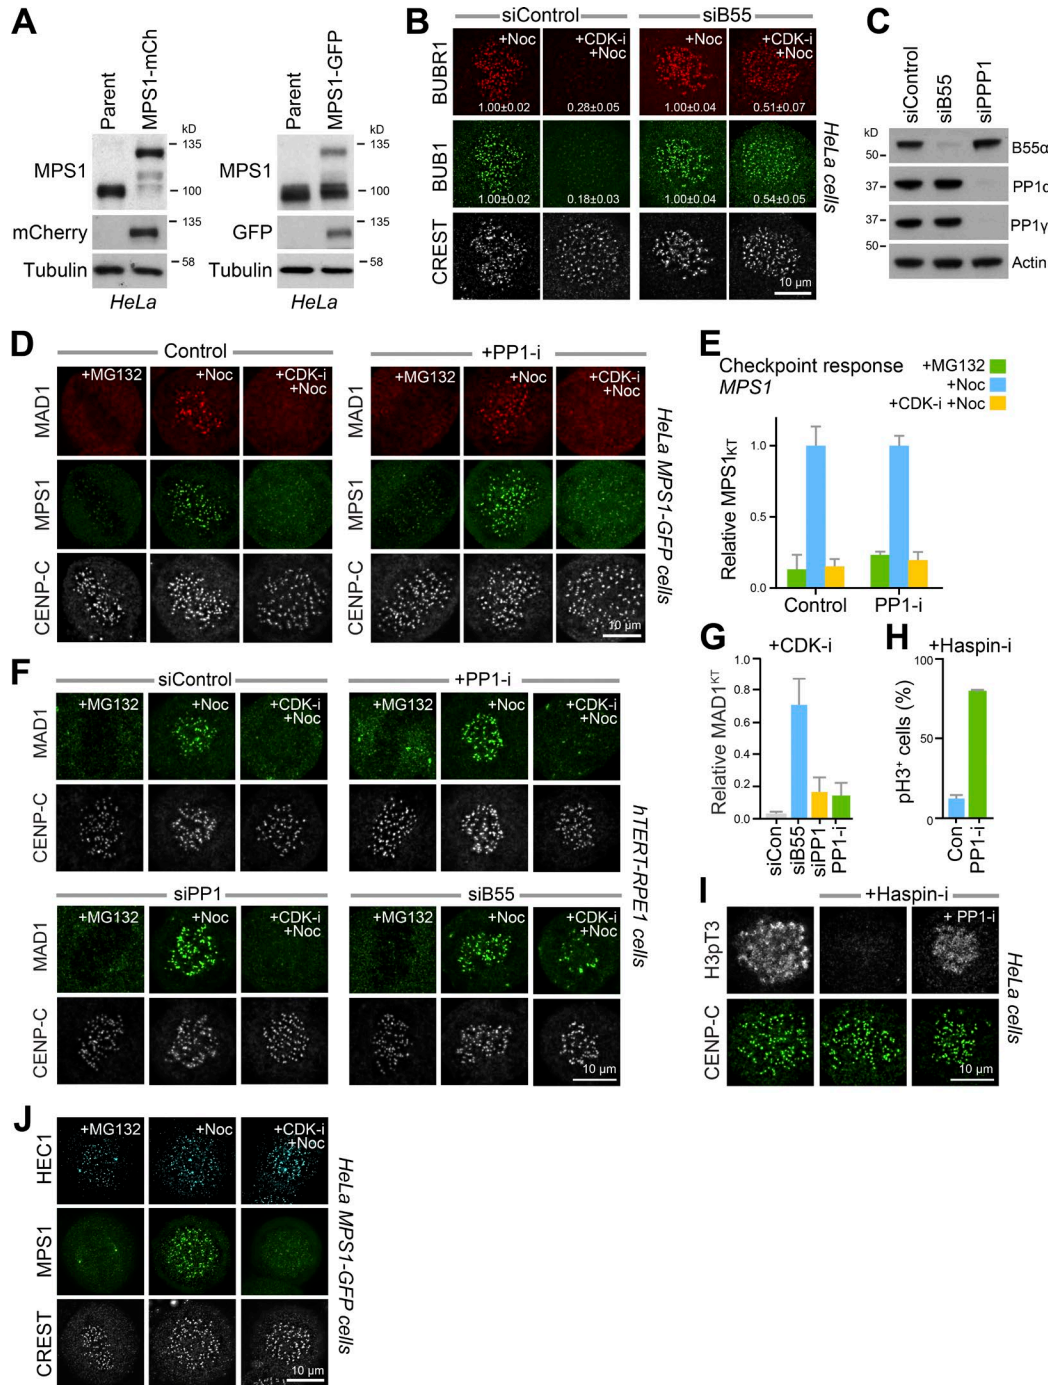

**Figure S1. Spindle checkpoint signaling is controlled by CDK1 and PP2A-B55.** (A) Western blots showing CRISPR/Cas9-mediated tagging of endogenous MPS1 with fluorescent epitope tags in HeLa cells. (B) Spindle checkpoint signaling was followed in control (siControl) and PP2A-B55-depleted (siB55) HeLa cells. Cells were arrested for 2.5 h with MG132 and then either fixed immediately, treated with 3  $\mu$ M nocodazole for 5 min (+Noc), or with flavopiridol for 1 min, followed by addition of 3  $\mu$ M nocodazole for 5 min (+CDK-i +Noc). BUB1, BUBR1, and kinetochores (CREST) were detected using antibodies. Mean levels  $\pm$  SD of kinetochore-associated BUB1 and BUBR1 normalized to the mean of the nocodazole-treated control signals for the same markers are indicated as inset numbers (15 cells and 15 kinetochores measured per cell in three independent experiments). (C) A representative Western blot analysis of PP2A-B55 and PP1 depletion efficiencies in checkpoint silencing assays. Actin is shown as a loading control. (D) Checkpoint signaling and endogenous MPS1 localization were followed in HeLa cells, treated with DMSO (Control) or 5  $\mu$ M tautomycin (+PP1-i) for 25 min before nocodazole addition, as described in B. (E) Kinetochore-associated MPS1-GFP in control or tautomycin-treated cells (PP1-i) was plotted; error bars indicate SEM. (F) hTERT-RPE-1 cells, either control depleted (siControl), treated with tautomycin (+PP1-i), as in D, or depleted of PP1 $\alpha$  (siPP1) or PP2A-B55 (siB55), were treated, as described for HeLa in B, and stained for MAD1 and CENP-C. (G) Mean levels of kinetochore-associated MAD1  $\pm$  SEM were plotted. (H and I) Nocodazole-arrested HeLa cells were either mock treated or treated with 5  $\mu$ M tautomycin for 25 min (+PP1-i) and then with 10  $\mu$ M Haspin inhibitor 5-iodotubercidin (Haspin-i) for 10 min. The Haspin target histone H3 phospho-threonine 3 (H3pT3) and CENP-C were stained with antibodies. The percentage of cells showing H3pT3 staining after Haspin inhibitor treatment was plotted in H, and representative images are shown in I. (J) HeLa MPS1-GFP cells were treated as in B. HEC1 and kinetochores (CREST) were detected using antibodies.

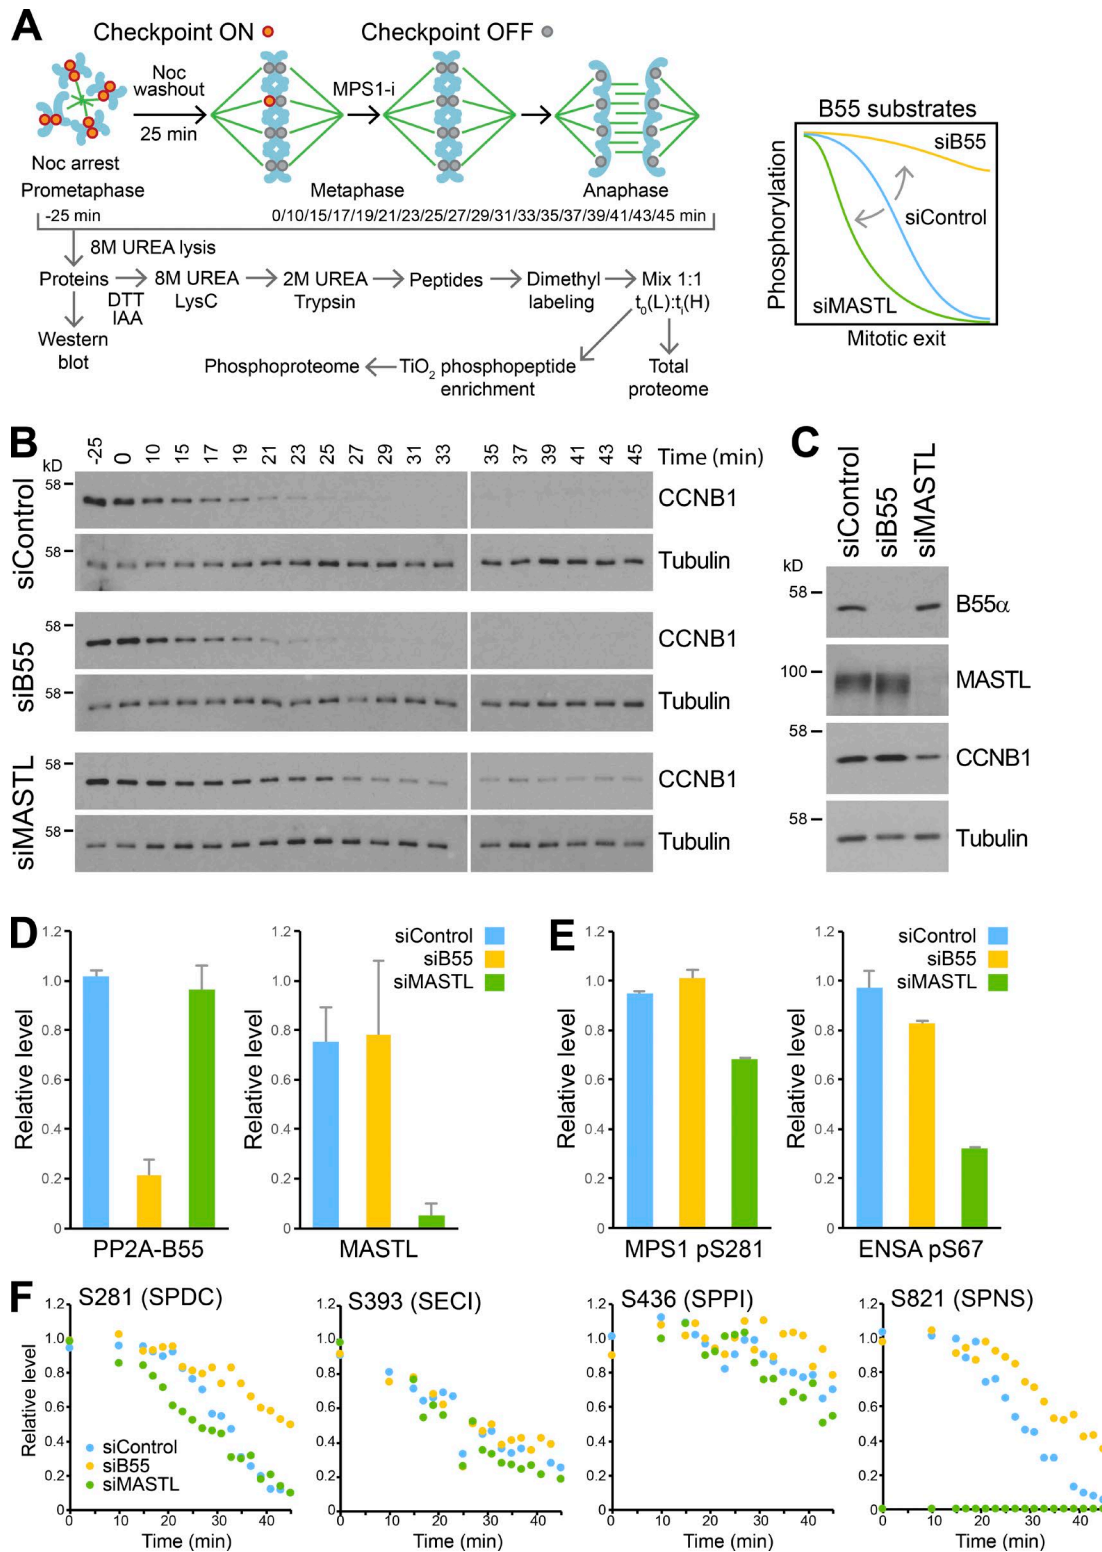

Figure S2. **Analysis of protein dephosphorylation during mitotic exit.** (A) A schematic explaining the mass spectrometry strategy used for combined analysis of protein phosphorylation status and total protein levels in cells undergoing checkpoint-regulated exit from mitosis. A cartoon of the behavior of PP2A-B55 substrates under control (siControl), PP2A-B55-depleted (siB55), and MASTL-depleted (siMASTL) conditions is shown. (B) Western blot analysis of CCNB1 and tubulin (loading control) levels during mitotic exit for control, siB55, and siMASTL cells. (C) Depletion efficiencies were confirmed by Western blotting of the PP2A-B55 $\alpha$ -regulatory subunit or MASTL. Tubulin is a loading control. (D) Depletion efficiency of PP2A-B55 and MASTL calculated from mass spectrometry data are plotted; bars indicate the SEM ( $n = 2$  independent experiments). (E) Steady-state levels of MPS1 pS281 and ENSA pS67 under siControl, siB55, and siMASTL conditions before checkpoint release were measured using mass spectrometry; bars indicate the SEM ( $n = 2$ ). (F) Dephosphorylation of the indicated phospho-sites on MPS1 in siControl, siMASTL, and siB55 cells was followed by mass spectrometry.

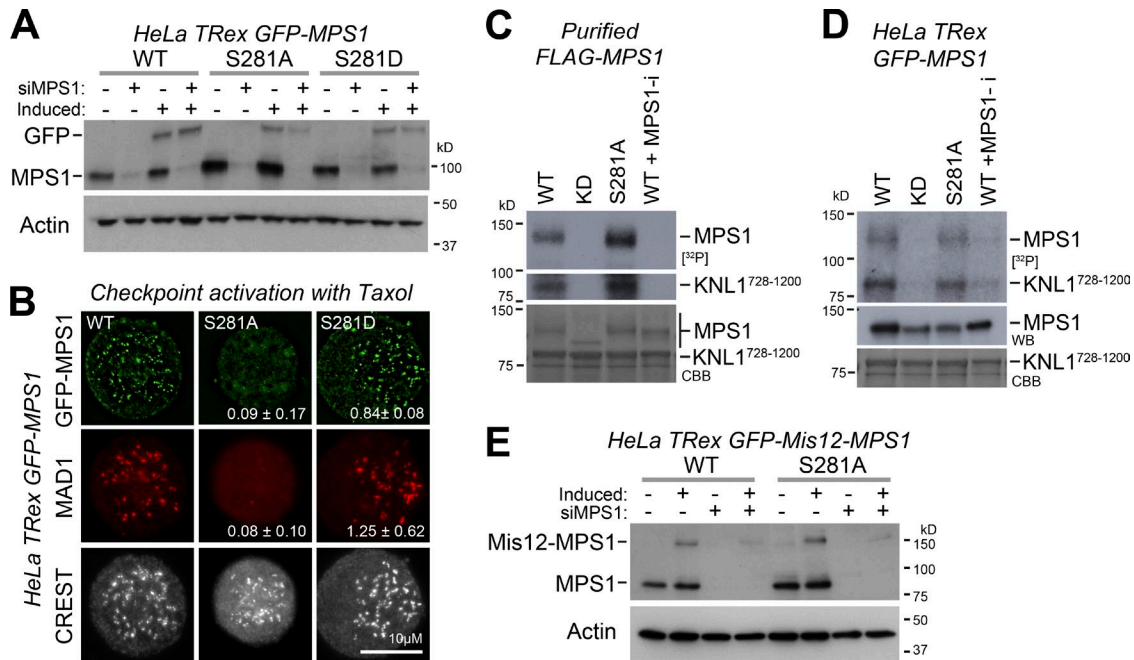

**Figure S3. MPS1 S281A fails to localize to kinetochores or activate the spindle checkpoint. (A and B)** HeLa Flp-In/TREx GFP-MPS1<sup>WT</sup>, GFP-MPS1<sup>S281A</sup>, or GFP-MPS1<sup>S281D</sup> cells were induced for (+) or left uninduced (-) with doxycycline. Endogenous MPS1 was depleted by addition of MPS1 3'-UTR siRNA after 6 h. After 54 h, the cells were treated with 0.1  $\mu$ M Taxol for 2 h. Cells were either Western blotted (A) or stained with antibodies for MAD1 and kinetochores (CREST; B). Numbers indicate mean kinetochore GFP-MPS1 or MAD1  $\pm$  SEM normalized to the mean of the MPS1<sup>WT</sup> condition ( $n = 11$  cells per condition with 15 kinetochores measured per cell). **(C)** Radioactive kinase assays with FLAG-MPS1<sup>WT</sup>, FLAG-MPS1<sup>KD</sup>, and FLAG-MPS1<sup>S281A</sup>, expressed in HEK293T cells or FLAG-MPS1<sup>WT</sup> + 30  $\mu$ M MPS1 inhibitor (WT + MPS1-i) and GST-KNL1<sup>728-1,200</sup> substrate (Espert et al., 2014) were performed. Phosphorylation of GST-KNL1<sup>728-1,200</sup> and FLAG-MPS1 autophosphorylation was measured by <sup>32</sup>P incorporation and radiograph. Equal loading of GST KNL1<sup>728-1,200</sup> and FLAG-MPS1 was determined by Coomassie Brilliant Blue staining. **(D)** Radioactive kinase assays with GFP-MPS1<sup>WT</sup>, GFP-MPS1<sup>KD</sup>, GFP-MPS1<sup>S281A</sup>, purified from HeLa Flp-In/TREx cells used in A and B, or GFP-MPS1<sup>WT</sup> + 30  $\mu$ M MPS1 inhibitor (WT + MPS1-i), were performed and analyzed as in C. Equal loading of GST KNL1<sup>728-1,200</sup> and GFP-MPS1 was determined by Coomassie Brilliant Blue staining and Western blotting with anti-MPS1 antibodies, respectively. **(E)** HeLa Flp-In/TREx GFP-Mis12-MPS1<sup>WT</sup> or GFP-Mis12-MPS1<sup>S281A</sup> cells were depleted of endogenous MPS1. GFP-Mis12-MPS1 transgenes were induced (+) for 24 h, and the cells were treated with 0.1  $\mu$ M Taxol for 2 h. Cells were Western blotted to confirm depletion of endogenous MPS1 and induction of GFP-tagged transgenes.

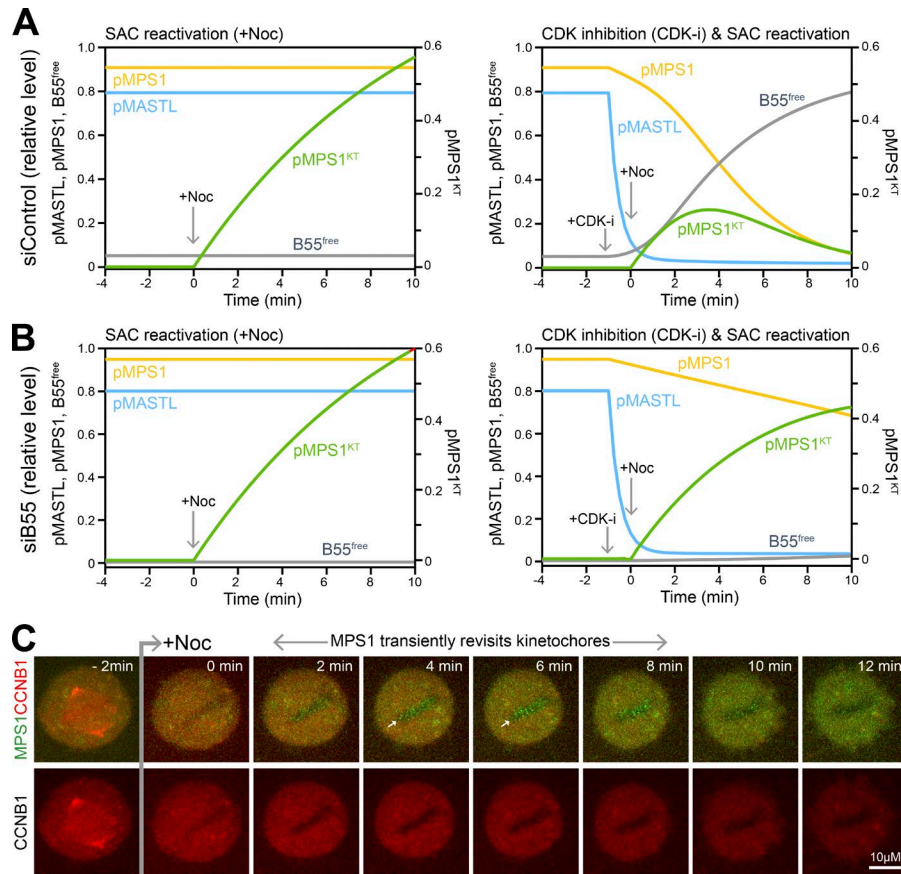

Figure S4. **Simulation explains how PP2A-B55 controls MPS1 dynamics during mitotic exit. (A and B)** Simulation of MPS1 kinetochore localization during checkpoint reactivation in control (A) and PP2A-B55-depleted (siB55; B55 = 0.2 and MASTL = 1.0) conditions (B), with or without CDK inhibition. **(C)** HeLa MPS1-GFP/CENPB1-mCherry cells in mitosis were imaged every minute until all the chromosomes had aligned and the checkpoint, visualized by MPS1, was silenced. 3 μM nocodazole was added (+Noc) to trigger checkpoint activation (defined as t = 0 min). Images from -2 min before nocodazole addition to 12 min after are shown.

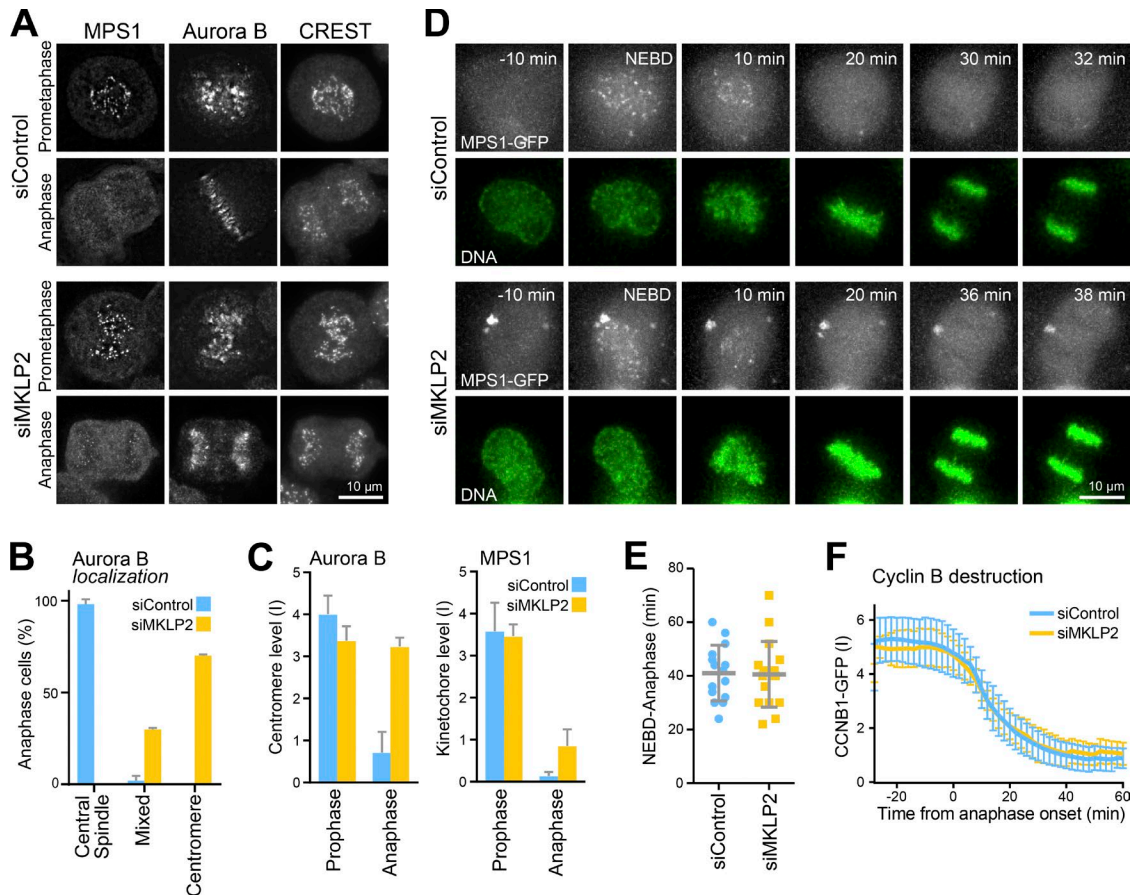

Figure S5. **MPS1 and Aurora B localization in MKLP2-depleted cells.** (A) Control (siControl) and MKLP2-depleted (siMKLP2) HeLa MPS1-GFP cells were stained for Aurora B and CREST. Examples of prometaphase and anaphase cells are shown. (B and C) The bar graphs show the percentage of anaphase cells with centromeric or central spindle localization of Aurora B (B) and the mean levels of Aurora B and MPS1 at centromeres and kinetochores, respectively, in both prometaphase and anaphase (C). Bars indicate the SEM ( $n = 2$  independent experiments totaling 15 cells [siControl] and 14 cells [siMKLP2]). (D) siControl and siMKLP2 HeLa MPS1-GFP cells were imaged every 2 min passing through mitosis. Timings are relative to NEBD. (E) Scatter plot indicating the average time from NEBD to anaphase onset in control and MKLP2-depleted cells. Every dot represents one cell; the mean and the SD are shown. (F) The graph shows mean CCNB1-GFP intensity (arbitrary fluorescence units) in siControl and siMKLP2 HeLa CCNB1-GFP cells, imaged every 2 min exiting mitosis. Bars indicate the SEM ( $n = 2$  independent experiments with seven cells per experiment). Timings are relative to chromosome segregation.

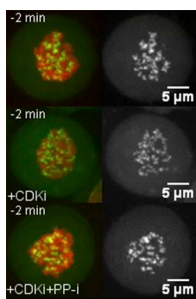

Video 1. **Related to Fig. 1.** GFP-MAD2 (green; left and grayscale)-expressing HeLa cells with addition of SiR-Hoechst at 100 nM 8 h before imaging (red) were arrested with 0.3  $\mu$ M nocodazole for 4 h and 20  $\mu$ M MG132 for 15 min before imaging to prevent mitotic exit. One image stack every minute was captured, with either DMSO (-CDKi), 5  $\mu$ M flavopiridol alone (+CDKi), or 25 nM calyculin A for 1 min before 5  $\mu$ M flavopiridol addition (+CDKi + PP-i) at 0 min. Video is shown at 7 fps.

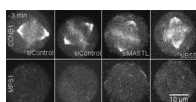

Video 2. **Related to Fig. 7.** Control (siControl), MASTL-depleted (siMASTL), and PP2A-B55-depleted (siB55) HeLa CCNB1-mCherry (top), and MPS1-GFP (bottom) cells were imaged every 2 min until metaphase, identified by spindle architecture defined by CCNB1 and lack of MPS1-positive kinetochores, was reached. These checkpoint-silenced cells were then challenged with 3  $\mu$ M nocodazole before time point 1 min. Image stacks were recorded 4 min before the addition of nocodazole and subsequently every 2 min for a further 37 min. Video is shown at 7 fps.

Table S1 is included as a separate Excel file, containing the dataset and parameters used for the simulation in Fig. 3. Data S1 included as a code file for the unified model of the spindle checkpoint and B55-regulated pathway.

## Reference

Espert, A., P. Uluocak, R.N. Bastos, D. Mangat, P. Graab, and U. Gruneberg. 2014. PP2A-B56 opposes Mps1 phosphorylation of Knl1 and thereby promotes spindle assembly checkpoint silencing. *J. Cell Biol.* 206:833–842. <https://doi.org/10.1083/jcb.201406109>
